# Supplementary material
Source: bioRxiv or medRxiv preprint supplement (https://medrxiv.org/highwire/filestream/94173/field_highwire_adjunct_files/1/2020.08.22.20180034-2.pdf)
Supplement: Supplementary file [file 2020.08.22.20180034-2.pdf]

Table S1. List of variants observed across all six Philippine SARS-CoV-2 samples.

| CHROM       | POS   | REF | ALT                                | EFFECT                | GENE   | GENEID     | cDNA POS | cDNA LENGTH | AMINO ACID POS | AMINO ACID LENGTH | cDNA CHANGE              | AMINO ACID CHANGE    | PGC001                   | PGC002 | PGC003 | PGC004 | PGC005 | PGC006 | Remarks                                    |
|-------------|-------|-----|------------------------------------|-----------------------|--------|------------|----------|-------------|----------------|-------------------|--------------------------|----------------------|--------------------------|--------|--------|--------|--------|--------|--------------------------------------------|
| NC_045512.2 | 231   | A   | T                                  | upstream_gene_variant | ORF1ab | GU280_pp01 | -1       | -1          | -1             | -1                | -1 c-35A>T               | .                    | 0/0                      | 0/0    | 0/0    | 1/1    | 0/0    | 0/0    |                                            |
| NC_045512.2 | 235   | A   | T                                  | upstream_gene_variant | ORF1ab | GU280_pp01 | -1       | -1          | -1             | -1                | -1 c-31A>T               | .                    | 0/0                      | 0/0    | 0/0    | 1/1    | 0/0    | 0/0    |                                            |
| NC_045512.2 | 264   | A   | T                                  | upstream_gene_variant | ORF1ab | GU280_pp01 | -1       | -1          | -1             | -1                | -1 c-2A>T                | .                    | 0/0                      | 0/0    | 0/0    | 1/1    | 0/0    | 0/0    | Seen in at least one other GISAID sequence |
| NC_045512.2 | 656   | G   | A                                  | missense_variant      | ORF1ab | GU280_pp01 | 391      | 21291       | 131            | 131               | 7096 c.391G>A            | p.Ala131Thr          | 0/0                      | 0/0    | 0/0    | 1/1    | 0/0    | 0/0    |                                            |
| NC_045512.2 | 959   | .   | G                                  | frameshift_variant    | ORF1ab | GU280_pp01 | 694      | 21291       | 232            | 232               | 7096 c.693_694insG       | p.Arg232fs           | 0/0                      | 0/0    | 0/0    | 0/0    | 1/1    | 0/0    |                                            |
| NC_045512.2 | 939   | T   | G                                  | synonymous_variant    | ORF1ab | GU280_pp01 | 2574     | 21291       | 858            | 858               | 7096 c.2574T>G           | p.Ser858Ser          | 0/0                      | 0/0    | 0/0    | 0/0    | 1/1    | 0/0    |                                            |
| NC_045512.2 | 3938  | .   | G                                  | frameshift_variant    | ORF1ab | GU280_pp01 | 3673     | 21291       | 1225           | 1225              | 7096 c.3672dupG          | p.Arg1225fs          | 1/1                      | 0/0    | 0/0    | 0/0    | 0/0    | 0/0    |                                            |
| NC_045512.2 | 4780  | C   | T                                  | synonymous_variant    | ORF1ab | GU280_pp01 | 4515     | 21291       | 1505           | 1505              | 7096 c.4515C>T           | p.Ile1505Ile         | 0/0                      | 0/0    | 1/1    | 0/0    | 0/0    | 0/0    | Seen in at least one other GISAID sequence |
| NC_045512.2 | 6312  | C   | A                                  | missense_variant      | ORF1ab | GU280_pp01 | 6047     | 21291       | 2016           | 2016              | 7096 c.6047C>A           | p.Thr2016Iys         | 1/1                      | 1/1    | 1/1    | 1/1    | 1/1    | 1/1    | Seen in at least one other GISAID sequence |
| NC_045512.2 | 6977  | .   | C                                  | frameshift_variant    | ORF1ab | GU280_pp01 | 6712     | 21291       | 2238           | 2238              | 7096 c.6711_6712insC     | p.Val2238fs          | 0/0                      | 0/0    | 0/0    | 1/1    | 0/0    | 0/0    |                                            |
| NC_045512.2 | 7488  | C   | T                                  | missense_variant      | ORF1ab | GU280_pp01 | 7223     | 21291       | 2408           | 2408              | 7096 c.7223C>T           | p.Thr2408Ile         | 0/0                      | 0/0    | 1/1    | 0/0    | 0/0    | 0/0    | Seen in at least one other GISAID sequence |
| NC_045512.2 | 8077  | A   | T                                  | synonymous_variant    | ORF1ab | GU280_pp01 | 7812     | 21291       | 2604           | 2604              | 7096 c.7812A>T           | p.Val2604Val         | 0/0                      | 0/0    | 0/0    | 1/1    | 0/0    | 0/0    |                                            |
| NC_045512.2 | 11074 | .   | TTT                                | inframe_insertion     | ORF1ab | GU280_pp01 | 10809    | 21291       | 3603           | 3603              | 7096 c.10809_10810insTTT | p.Phe3606ins         | 0/0                      | 1/1    | 0/0    | 0/0    | 0/0    | 0/0    | Seen in at least one other GISAID sequence |
| NC_045512.2 | 11076 | T   | G                                  | missense_variant      | ORF1ab | GU280_pp01 | 10811    | 21291       | 3604           | 3604              | 7096 c.10811T>G          | p.Phe3604Cys         | 1/1                      | 0/0    | 0/0    | 0/0    | 0/0    | 0/0    |                                            |
| NC_045512.2 | 11083 | G   | T                                  | missense_variant      | ORF1ab | GU280_pp01 | 10818    | 21291       | 3606           | 3606              | 7096 c.10818G>T          | p.Leu3606Phe         | 1/1                      | 1/1    | 1/1    | 1/1    | 1/1    | 1/1    | Seen in at least one other GISAID sequence |
| NC_045512.2 | 13582 | T   | A                                  | missense_variant      | ORF1ab | GU280_pp01 | 13318    | 21291       | 4440           | 4440              | 7096 c.13318T>A          | p.Phe4400Ile         | 0/0                      | 0/0    | 0/0    | 0/0    | 1/1    | 0/0    |                                            |
| NC_045512.2 | 13730 | C   | T                                  | missense_variant      | ORF1ab | GU280_pp01 | 13466    | 21291       | 4489           | 4489              | 7096 c.13466C>T          | p.Ala4489Val         | 1/1                      | 1/1    | 1/1    | 1/1    | 1/1    | 1/1    |                                            |
| NC_045512.2 | 14840 | T   | G                                  | missense_variant      | ORF1ab | GU280_pp01 | 14585    | 21291       | 4862           | 4862              | 7096 c.14585T>G          | p.Leu4862Arg         | 0/0                      | 1/1    | 0/0    | 0/0    | 0/0    | 0/0    | Seen in at least one other GISAID sequence |
| NC_045512.2 | 14856 | A   | T                                  | synonymous_variant    | ORF1ab | GU280_pp01 | 14592    | 21291       | 4864           | 4864              | 7096 c.14592A>T          | p.Val4864Val         | 0/0                      | 1/1    | 0/0    | 0/0    | 0/0    | 0/0    |                                            |
| NC_045512.2 | 14858 | T   | A                                  | missense_variant      | ORF1ab | GU280_pp01 | 14594    | 21291       | 4865           | 4865              | 7096 c.14594T>A          | p.Val4865Asp         | 0/0                      | 1/1    | 0/0    | 0/0    | 0/0    | 0/0    |                                            |
| NC_045512.2 | 14999 | G   | T                                  | missense_variant      | ORF1ab | GU280_pp01 | 14735    | 21291       | 4912           | 4912              | 7096 c.14735G>T          | p.Ser4912Ile         | 1/1                      | 0/0    | 0/0    | 0/0    | 0/0    | 0/0    |                                            |
| NC_045512.2 | 15006 | G   | T                                  | missense_variant      | ORF1ab | GU280_pp01 | 14742    | 21291       | 4914           | 4914              | 7096 c.14742G>T          | p.Glu4914Asp         | 1/1                      | 0/0    | 0/0    | 0/0    | 0/0    | 0/0    |                                            |
| NC_045512.2 | 15007 | G   | T                                  | missense_variant      | ORF1ab | GU280_pp01 | 14743    | 21291       | 4915           | 4915              | 7096 c.14743G>T          | p.Asp4915Iyr         | 1/1                      | 0/0    | 0/0    | 0/0    | 0/0    | 0/0    |                                            |
| NC_045512.2 | 15025 | G   | T                                  | missense_variant      | ORF1ab | GU280_pp01 | 14761    | 21291       | 4921           | 4921              | 7096 c.14761G>T          | p.Ala4921Ser         | 1/1                      | 0/0    | 0/0    | 0/0    | 0/0    | 0/0    |                                            |
| NC_045512.2 | 15925 | C   | A                                  | missense_variant      | ORF1ab | GU280_pp01 | 15661    | 21291       | 5221           | 5221              | 7096 c.15661C>A          | p.Leu5221Ile         | 1/1                      | 0/0    | 0/0    | 0/0    | 0/0    | 0/0    |                                            |
| NC_045512.2 | 17169 | T   | A                                  | missense_variant      | ORF1ab | GU280_pp01 | 16905    | 21291       | 5635           | 5635              | 7096 c.16905T>A          | p.His5635Gln         | 0/0                      | 0/0    | 0/0    | 1/1    | 0/0    | 0/0    |                                            |
| NC_045512.2 | 17177 | T   | A                                  | missense_variant      | ORF1ab | GU280_pp01 | 16913    | 21291       | 5638           | 5638              | 7096 c.16913T>A          | p.Val5638Asp         | 0/0                      | 0/0    | 0/0    | 1/1    | 0/0    | 0/0    | Seen in at least one other GISAID sequence |
| NC_045512.2 | 17193 | G   | T                                  | missense_variant      | ORF1ab | GU280_pp01 | 16929    | 21291       | 5643           | 5643              | 7096 c.16929G>T          | p.Glu5643Asp         | 0/0                      | 0/0    | 0/0    | 1/1    | 0/0    | 0/0    |                                            |
| NC_045512.2 | 17642 | C   | T                                  | missense_variant      | ORF1ab | GU280_pp01 | 17378    | 21291       | 5793           | 5793              | 7096 c.17378C>T          | p.Ala5793Val         | 1/1                      | 0/0    | 0/0    | 0/0    | 0/0    | 0/0    |                                            |
| NC_045512.2 | 19443 | A   | T                                  | synonymous_variant    | ORF1ab | GU280_pp01 | 19179    | 21291       | 6393           | 6393              | 7096 c.19179A>T          | p.Leu6393Leu         | 0/0                      | 0/0    | 0/0    | 0/0    | 1/1    | 0/0    |                                            |
| NC_045512.2 | 19457 | A   | G                                  | missense_variant      | ORF1ab | GU280_pp01 | 19193    | 21291       | 6398           | 6398              | 7096 c.19193G>A          | p.Cys6398Trp         | 0/0                      | 0/0    | 0/0    | 0/0    | 1/1    | 0/0    |                                            |
| NC_045512.2 | 19458 | T   | A                                  | stop_rained           | ORF1ab | GU280_pp01 | 19194    | 21291       | 6398           | 6398              | 7096 c.19194T>A          | p.Cys6398*           | 0/0                      | 0/0    | 0/0    | 0/0    | 1/1    | 0/0    |                                            |
| NC_045512.2 | 19475 | T   | G                                  | stop_gained           | ORF1ab | GU280_pp01 | 19211    | 21291       | 6404           | 6404              | 7096 c.19211T>G          | p.Leu6404*           | 0/0                      | 0/0    | 0/0    | 0/0    | 1/1    | 0/0    |                                            |
| NC_045512.2 | 20257 | T   | A                                  | missense_variant      | ORF1ab | GU280_pp01 | 19953    | 21291       | 6655           | 6655              | 7096 c.19953T>A          | p.Phe6655Ile         | 0/0                      | 0/0    | 0/0    | 0/0    | 1/1    | 0/0    |                                            |
| NC_045512.2 | 20285 | T   | A                                  | missense_variant      | ORF1ab | GU280_pp01 | 20021    | 21291       | 6674           | 6674              | 7096 c.20021T>A          | p.Ile6674Asn         | 0/0                      | 0/0    | 0/0    | 0/0    | 1/1    | 0/0    |                                            |
| NC_045512.2 | 20437 | A   | T                                  | missense_variant      | ORF1ab | GU280_pp01 | 20173    | 21291       | 6725           | 6725              | 7096 c.20173A>T          | p.Ser6725Cys         | 0/0                      | 1/1    | 0/0    | 0/0    | 0/0    | 0/0    |                                            |
| NC_045512.2 | 20449 | A   | T                                  | missense_variant      | ORF1ab | GU280_pp01 | 20185    | 21291       | 6729           | 6729              | 7096 c.20185A>T          | p.Asn6729Trp         | 0/0                      | 0/0    | 1/1    | 0/0    | 0/0    | 0/0    |                                            |
| NC_045512.2 | 20497 | T   | A                                  | missense_variant      | ORF1ab | GU280_pp01 | 20233    | 21291       | 6745           | 6745              | 7096 c.20233T>A          | p.Ser6745Thr         | 1/1                      | 0/0    | 0/0    | 0/0    | 0/0    | 0/0    | Seen in at least one other GISAID sequence |
| NC_045512.2 | 21426 | T   | G                                  | synonymous_variant    | ORF1ab | GU280_pp01 | 21162    | 21291       | 7054           | 7054              | 7096 c.21162T>G          | p.Gly7054Gly         | 0/0                      | 1/1    | 0/0    | 0/0    | 0/0    | 0/0    |                                            |
| NC_045512.2 | 23929 | C   | T                                  | synonymous_variant    | S      | GU280_pp02 | 2367     | 3822        | 789            | 789               | 1273 c.2367C>T           | p.Tyr789Trp          | 1/1                      | 1/1    | 1/1    | 1/1    | 1/1    | 1/1    | Seen in at least one other GISAID sequence |
| NC_045512.2 | 23940 | C   | T                                  | missense_variant      | S      | GU280_pp02 | 2378     | 3822        | 793            | 793               | 1273 c.2378C>T           | p.Pro793Leu          | 0/0                      | 0/0    | 0/0    | 0/0    | 1/1    | 0/0    |                                            |
| NC_045512.2 | 25533 | T   | A                                  | synonymous_variant    | ORF3a  | GU280_pp03 | 141      | 828         | 275            | 275               | c.141T>A                 | p.Ile471Ile          | 0/0                      | 1/1    | 0/0    | 0/0    | 0/0    | 0/0    |                                            |
| NC_045512.2 | 25613 | C   | T                                  | missense_variant      | ORF3a  | GU280_pp03 | 221      | 828         | 47             | 47                | c.221C>T                 | p.Ser74Phe           | 0/0                      | 0/0    | 0/0    | 0/0    | 0/0    | 1/1    | Seen in at least one other GISAID sequence |
| NC_045512.2 | 26048 | T   | G                                  | missense_variant      | ORF3a  | GU280_pp03 | 656      | 828         | 219            | 219               | c.656T>G                 | p.Leu219Trp          | 0/0                      | 0/0    | 1/1    | 0/0    | 0/0    | 0/0    |                                            |
| NC_045512.2 | 26849 | G   | T                                  | missense_variant      | M      | GU280_pp05 | 327      | 669         | 109            | 109               | c.327G>T                 | p.Met109Ile          | 0/0                      | 0/0    | 1/1    | 0/0    | 0/0    | 0/0    |                                            |
| NC_045512.2 | 27058 | .   | AATTGGAGCTTCGCAGCGTGTAGCAGGTGACTCA | frameshift_variant    | M      | GU280_pp05 | 571      | 669         | 190            | 190               | c.571del                 | p.Asp190_Ser191ins11 | 0/0                      | 1/1    | 0/0    | 0/0    | 0/0    | 0/0    | Seen in at least one other GISAID sequence |
| NC_045512.2 | 27671 | T   | A                                  | missense_variant      | ORF7a  | GU280_pp07 | 278      | 366         | 93             | 93                | c.278T>A                 | p.Val93Asp           | 0/0                      | 0/0    | 0/0    | 0/0    | 1/1    | 0/0    | Seen in at least one other GISAID sequence |
| NC_045512.2 | 28311 | C   | T                                  | missense_variant      | N      | GU280_pp10 | 38       | 1260        | 13             | 13                | c.38C>T                  | p.Pro13Leu           | 1/1                      | 1/1    | 1/1    | 1/1    | 1/1    | 1/1    | Seen in at least one other GISAID sequence |
|             |       |     |                                    |                       |        |            |          |             |                |                   |                          |                      | Variant Count per Sample |        |        |        |        |        |                                            |
|             |       |     |                                    |                       |        |            |          |             |                |                   |                          |                      | 14                       | 14     | 9      | 14     | 16     | 6      |                                            |
